# Supplementary material
Source: PubMed Central journal article supplement (PMC1782371)
Supplement: 7601463s2.pdf [file 7601463s2.pdf]

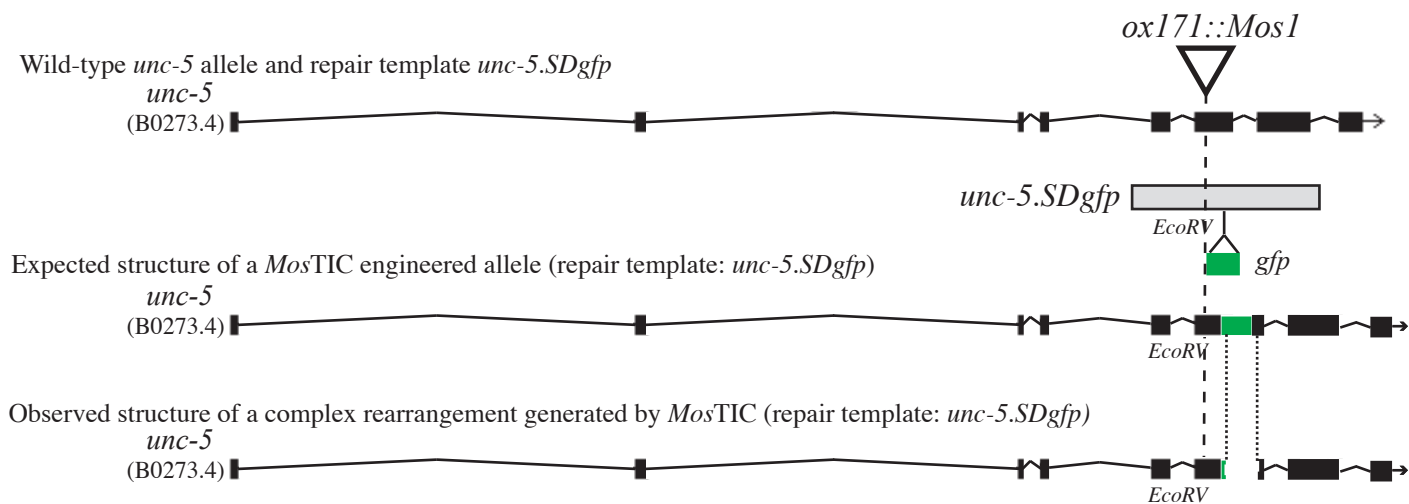

Figure S2: Description of the complex rearrangement observed after *MosTIC* experiments with the repair template *unc-5.SDgfp*. After *MosTIC* experiments using *unc-5.SDgfp* as a repair template, one of the identified strains only carried the first 227 5' bp of the *gfp* sequence. 135 bp of the *unc-5* sequence immediately 3' to the *gfp* insertion were deleted. Such structure might have been generated by aborted SDSA.
